# Supplementary material
Source: PubMed Central journal article supplement (PMC9086937)

## Supplementary Online Content

Rafii MS, Sol O, Mobley WC, et al. Safety, tolerability, and immunogenicity of the ACI-24 vaccine in adults with Down syndrome: a phase 1b randomized clinical trial. *JAMA Neurol.* Published online May 9, 2022. doi:10.1001/jamaneurol.2022.0983

**eTable.** Columbia–Suicide Severity Rating Scale (C-SSRS)

**eFigure 1.** Angiogenic Markers

**eFigure 2.** Body Mass Index

**eFigure 3.** Anti–Amyloid- $\beta$  1-42 Immunoglobulin G Titer in Serum Using the Meso Scale Discovery Free Assay: Change From Baseline in Modified Intention-to-Treat Population per Individual Participant

**eFigure 4.** Alzheimer Disease Biomarkers

**eFigure 5.** Cognitive Measures

This supplementary material has been provided by the authors to give readers additional information about their work.

**eTable. Columbia–Suicide Severity Rating Scale (C-SSRS)**

Appendix

| Suicidal ideation/ behavior                         |                          |                  | Descriptive statistics |                       |                    |                    |              |             |
|-----------------------------------------------------|--------------------------|------------------|------------------------|-----------------------|--------------------|--------------------|--------------|-------------|
| Suicidal ideation/ behavior: General questions, SAF |                          |                  | ACI-24 300 µg (N=6)    | ACI-24 1,000 µg (N=6) | Placebo coh1 (N=2) | Placebo coh2 (N=2) | Total (N=16) |             |
| Result                                              |                          |                  |                        |                       |                    |                    |              |             |
| Wish to die/sleep & Never wake up                   | Screening                | no               | 6 (100.0%)             | 6 (100.0%)            | 2 (100.0%)         | 2 (100.0%)         | 16 (100.0%)  |             |
|                                                     |                          | yes              | 0 ( 0.0%)              | 0 ( 0.0%)             | 0 ( 0.0%)          | 0 ( 0.0%)          | 0 ( 0.0%)    |             |
|                                                     | Visit 1 (week 0)         | no               | 6 (100.0%)             | 6 (100.0%)            | 2 (100.0%)         | 2 (100.0%)         | 16 (100.0%)  |             |
|                                                     |                          | yes              | 0 ( 0.0%)              | 0 ( 0.0%)             | 0 ( 0.0%)          | 0 ( 0.0%)          | 0 ( 0.0%)    |             |
|                                                     | Visit 17 (week 50)       | no               | 6 (100.0%)             | 6 (100.0%)            | 2 (100.0%)         | 2 (100.0%)         | 16 (100.0%)  |             |
|                                                     |                          | yes              | 0 ( 0.0%)              | 0 ( 0.0%)             | 0 ( 0.0%)          | 0 ( 0.0%)          | 0 ( 0.0%)    |             |
|                                                     | Visit 21 (week 96)       | no               | 6 (100.0%)             | 4 (100.0%)            | 2 (100.0%)         | 2 (100.0%)         | 14 (100.0%)  |             |
|                                                     |                          | yes              | 0 ( 0.0%)              | 0 ( 0.0%)             | 0 ( 0.0%)          | 0 ( 0.0%)          | 0 ( 0.0%)    |             |
|                                                     | Attempted Suicide        | Screening        | no                     | 6 (100.0%)            | 6 (100.0%)         | 2 (100.0%)         | 2 (100.0%)   | 16 (100.0%) |
|                                                     |                          |                  | yes                    | 0 ( 0.0%)             | 0 ( 0.0%)          | 0 ( 0.0%)          | 0 ( 0.0%)    | 0 ( 0.0%)   |
|                                                     |                          | Visit 1 (week 0) | no                     | 6 (100.0%)            | 6 (100.0%)         | 2 (100.0%)         | 2 (100.0%)   | 16 (100.0%) |
|                                                     |                          |                  | yes                    | 0 ( 0.0%)             | 0 ( 0.0%)          | 0 ( 0.0%)          | 0 ( 0.0%)    | 0 ( 0.0%)   |
| Visit 17 (week 50)                                  |                          | no               | 6 (100.0%)             | 6 (100.0%)            | 2 (100.0%)         | 2 (100.0%)         | 16 (100.0%)  |             |
|                                                     |                          | yes              | 0 ( 0.0%)              | 0 ( 0.0%)             | 0 ( 0.0%)          | 0 ( 0.0%)          | 0 ( 0.0%)    |             |
| Visit 21 (week 96)                                  |                          | no               | 6 (100.0%)             | 4 (100.0%)            | 2 (100.0%)         | 2 (100.0%)         | 14 (100.0%)  |             |
|                                                     |                          | yes              | 0 ( 0.0%)              | 0 ( 0.0%)             | 0 ( 0.0%)          | 0 ( 0.0%)          | 0 ( 0.0%)    |             |
| Harmed Himself/Herself                              |                          | Screening        | no                     | 6 (100.0%)            | 5 ( 83.3%)         | 2 (100.0%)         | 2 (100.0%)   | 15 ( 93.8%) |
|                                                     |                          |                  | yes                    | 0 ( 0.0%)             | 1 ( 16.7%)         | 0 ( 0.0%)          | 0 ( 0.0%)    | 1 ( 6.3%)   |
|                                                     |                          | Visit 1 (week 0) | no                     | 6 (100.0%)            | 5 ( 83.3%)         | 2 (100.0%)         | 2 (100.0%)   | 15 ( 93.8%) |
|                                                     |                          |                  | yes                    | 0 ( 0.0%)             | 1 ( 16.7%)         | 0 ( 0.0%)          | 0 ( 0.0%)    | 1 ( 6.3%)   |
|                                                     | Visit 17 (week 50)       | no               | 6 (100.0%)             | 6 (100.0%)            | 2 (100.0%)         | 2 (100.0%)         | 16 (100.0%)  |             |
|                                                     |                          | yes              | 0 ( 0.0%)              | 0 ( 0.0%)             | 0 ( 0.0%)          | 0 ( 0.0%)          | 0 ( 0.0%)    |             |
|                                                     | Visit 21 (week 96)       | no               | 6 (100.0%)             | 4 (100.0%)            | 2 (100.0%)         | 2 (100.0%)         | 14 (100.0%)  |             |
|                                                     |                          | yes              | 0 ( 0.0%)              | 0 ( 0.0%)             | 0 ( 0.0%)          | 0 ( 0.0%)          | 0 ( 0.0%)    |             |
|                                                     | Self-Injurious Behaviour | Screening        | no                     | 6 (100.0%)            | 5 ( 83.3%)         | 2 (100.0%)         | 2 (100.0%)   | 15 ( 93.8%) |
|                                                     |                          |                  | yes                    | 0 ( 0.0%)             | 1 ( 16.7%)         | 0 ( 0.0%)          | 0 ( 0.0%)    | 1 ( 6.3%)   |
|                                                     |                          | Visit 1 (week 0) | no                     | 6 (100.0%)            | 5 ( 83.3%)         | 2 (100.0%)         | 2 (100.0%)   | 15 ( 93.8%) |
|                                                     |                          |                  | yes                    | 0 ( 0.0%)             | 1 ( 16.7%)         | 0 ( 0.0%)          | 0 ( 0.0%)    | 1 ( 6.3%)   |
| Visit 17 (week 50)                                  |                          | no               | 6 (100.0%)             | 6 (100.0%)            | 2 (100.0%)         | 2 (100.0%)         | 16 (100.0%)  |             |
|                                                     |                          | yes              | 0 ( 0.0%)              | 0 ( 0.0%)             | 0 ( 0.0%)          | 0 ( 0.0%)          | 0 ( 0.0%)    |             |
| Visit 21 (week 96)                                  |                          | no               | 6 (100.0%)             | 4 (100.0%)            | 2 (100.0%)         | 2 (100.0%)         | 14 (100.0%)  |             |
|                                                     |                          | yes              | 0 ( 0.0%)              | 0 ( 0.0%)             | 0 ( 0.0%)          | 0 ( 0.0%)          | 0 ( 0.0%)    |             |

|                               |                  |     | ACI-24 300 µg<br>(N=0) | ACI-24 1,000 µg<br>(N=1) | Placebo coh1<br>(N=0) | Placebo coh2<br>(N=0) | Total<br>(N=1) |
|-------------------------------|------------------|-----|------------------------|--------------------------|-----------------------|-----------------------|----------------|
| Wish to be Dead               | Screening        | no  | 0 ( 0.0%)              | 1 (100.0%)               | 0 ( 0.0%)             | 0 ( 0.0%)             | 1 (100.0%)     |
|                               |                  | yes | 0 ( 0.0%)              | 0 ( 0.0%)                | 0 ( 0.0%)             | 0 ( 0.0%)             | 0 ( 0.0%)      |
|                               | Visit 1 (week 0) | no  | 0 ( 0.0%)              | 1 (100.0%)               | 0 ( 0.0%)             | 0 ( 0.0%)             | 1 (100.0%)     |
|                               |                  | yes | 0 ( 0.0%)              | 0 ( 0.0%)                | 0 ( 0.0%)             | 0 ( 0.0%)             | 0 ( 0.0%)      |
| Non-Specific Suicidal Thought | Screening        | no  | 0 ( 0.0%)              | 0 ( 0.0%)                | 0 ( 0.0%)             | 0 ( 0.0%)             | 0 ( 0.0%)      |
|                               |                  | yes | 0 ( 0.0%)              | 1 (100.0%)               | 0 ( 0.0%)             | 0 ( 0.0%)             | 1 (100.0%)     |
|                               | Visit 1 (week 0) | no  | 0 ( 0.0%)              | 0 ( 0.0%)                | 0 ( 0.0%)             | 0 ( 0.0%)             | 0 ( 0.0%)      |
|                               |                  | yes | 0 ( 0.0%)              | 1 (100.0%)               | 0 ( 0.0%)             | 0 ( 0.0%)             | 1 (100.0%)     |
| Suicidal Ideation-No Intent   | Screening        | no  | 0 ( 0.0%)              | 0 ( 0.0%)                | 0 ( 0.0%)             | 0 ( 0.0%)             | 0 ( 0.0%)      |
|                               |                  | yes | 0 ( 0.0%)              | 1 (100.0%)               | 0 ( 0.0%)             | 0 ( 0.0%)             | 1 (100.0%)     |
|                               | Visit 1 (week 0) | no  | 0 ( 0.0%)              | 0 ( 0.0%)                | 0 ( 0.0%)             | 0 ( 0.0%)             | 0 ( 0.0%)      |
|                               |                  | yes | 0 ( 0.0%)              | 1 (100.0%)               | 0 ( 0.0%)             | 0 ( 0.0%)             | 1 (100.0%)     |
| Ideation With Intent, No Plan | Screening        | no  | 0 ( 0.0%)              | 0 ( 0.0%)                | 0 ( 0.0%)             | 0 ( 0.0%)             | 0 ( 0.0%)      |
|                               |                  | yes | 0 ( 0.0%)              | 1 (100.0%)               | 0 ( 0.0%)             | 0 ( 0.0%)             | 1 (100.0%)     |
|                               | Visit 1 (week 0) | no  | 0 ( 0.0%)              | 0 ( 0.0%)                | 0 ( 0.0%)             | 0 ( 0.0%)             | 0 ( 0.0%)      |
|                               |                  | yes | 0 ( 0.0%)              | 1 (100.0%)               | 0 ( 0.0%)             | 0 ( 0.0%)             | 1 (100.0%)     |

**eFigure 1. Angiogenic Markers**

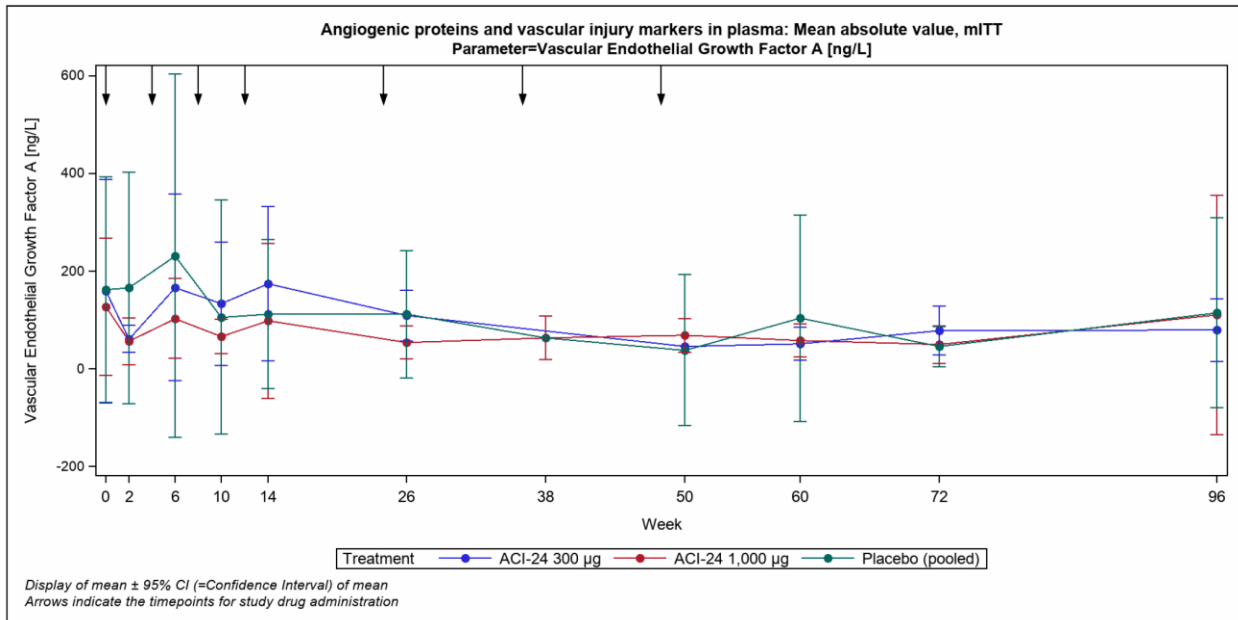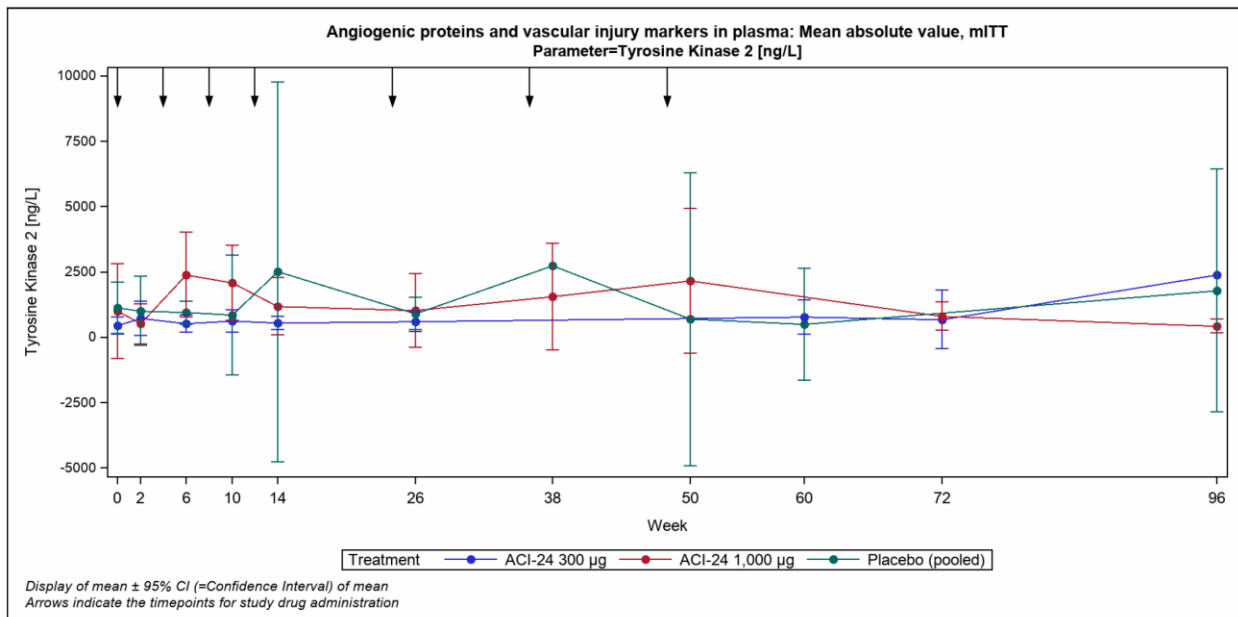

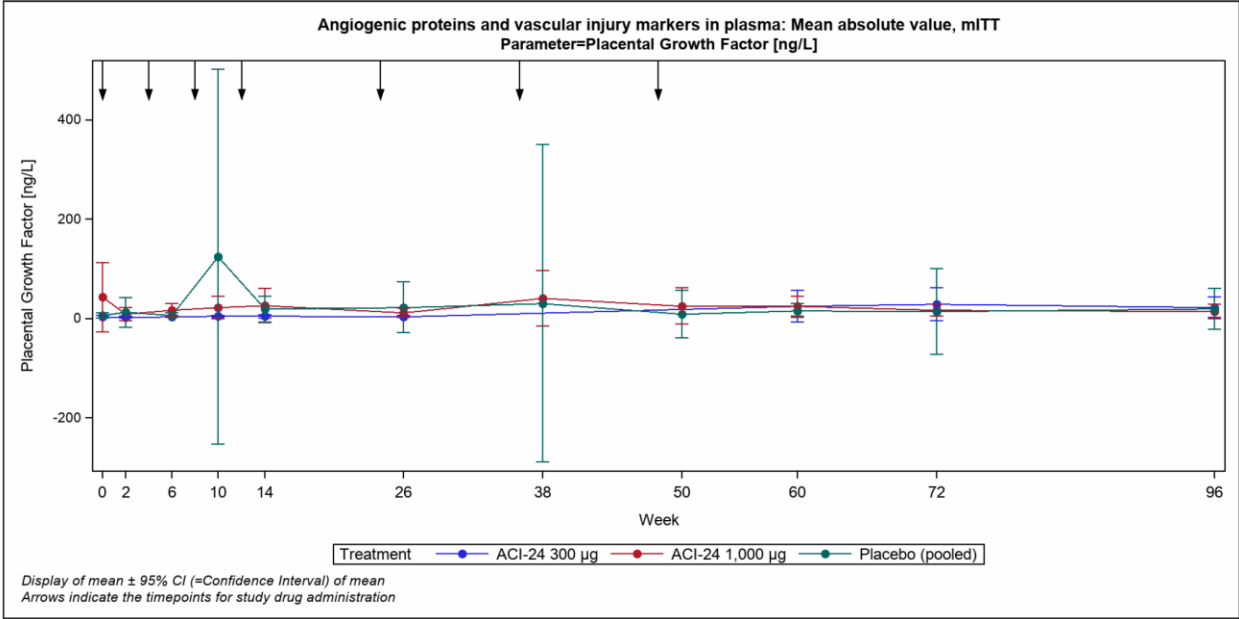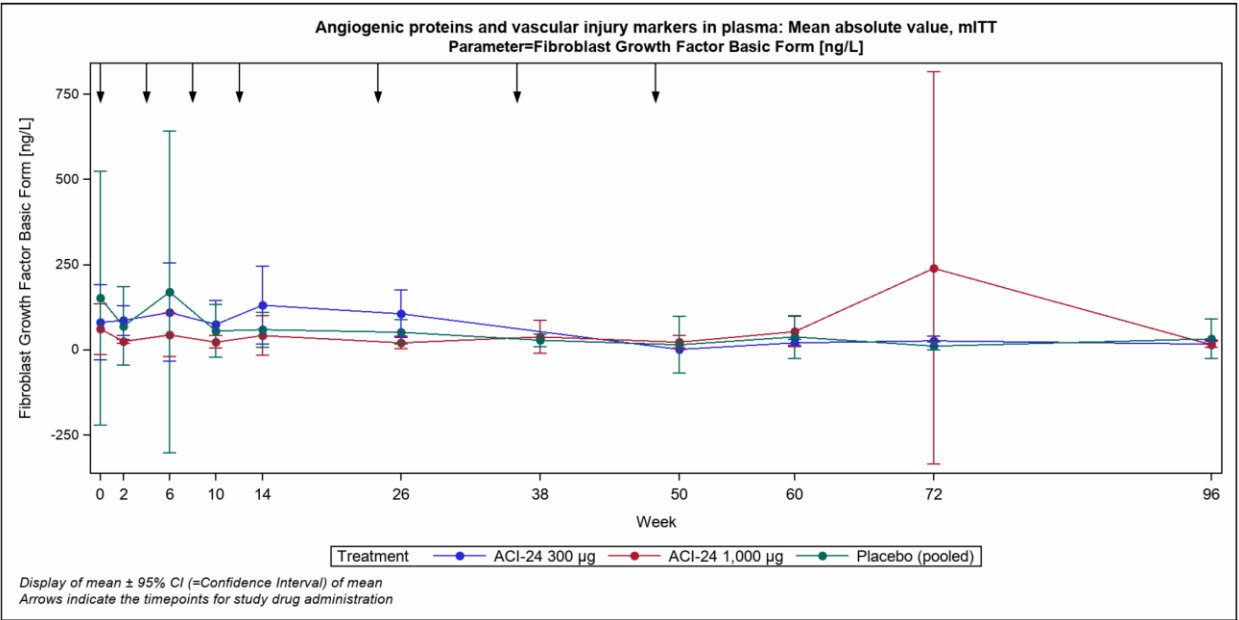

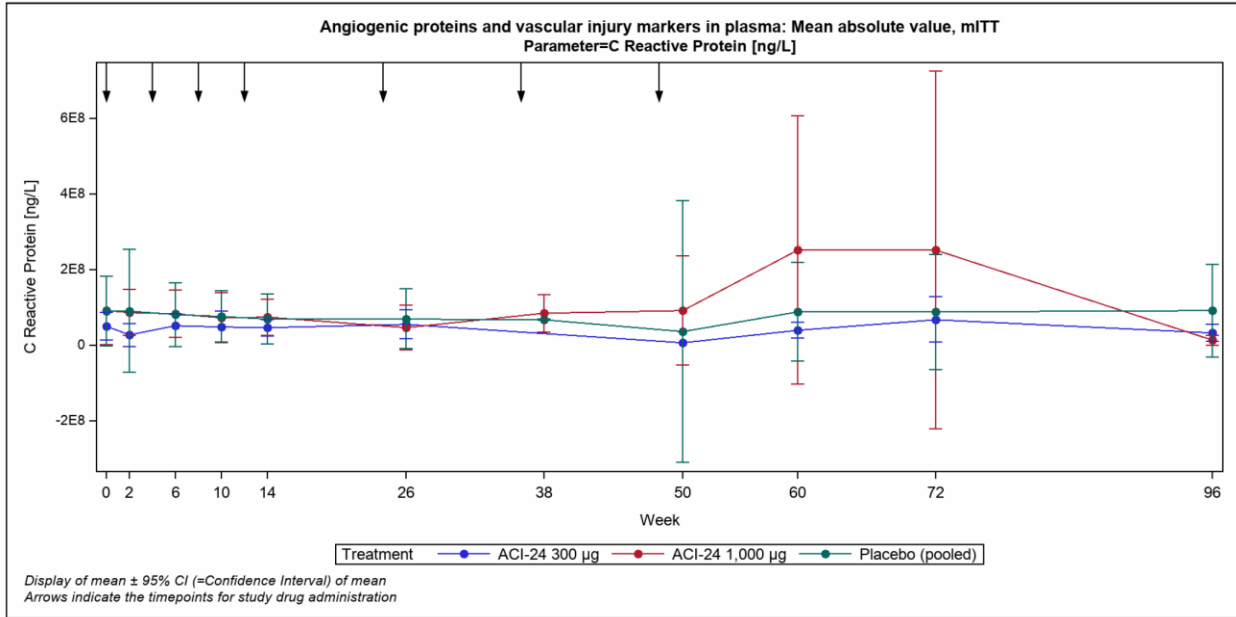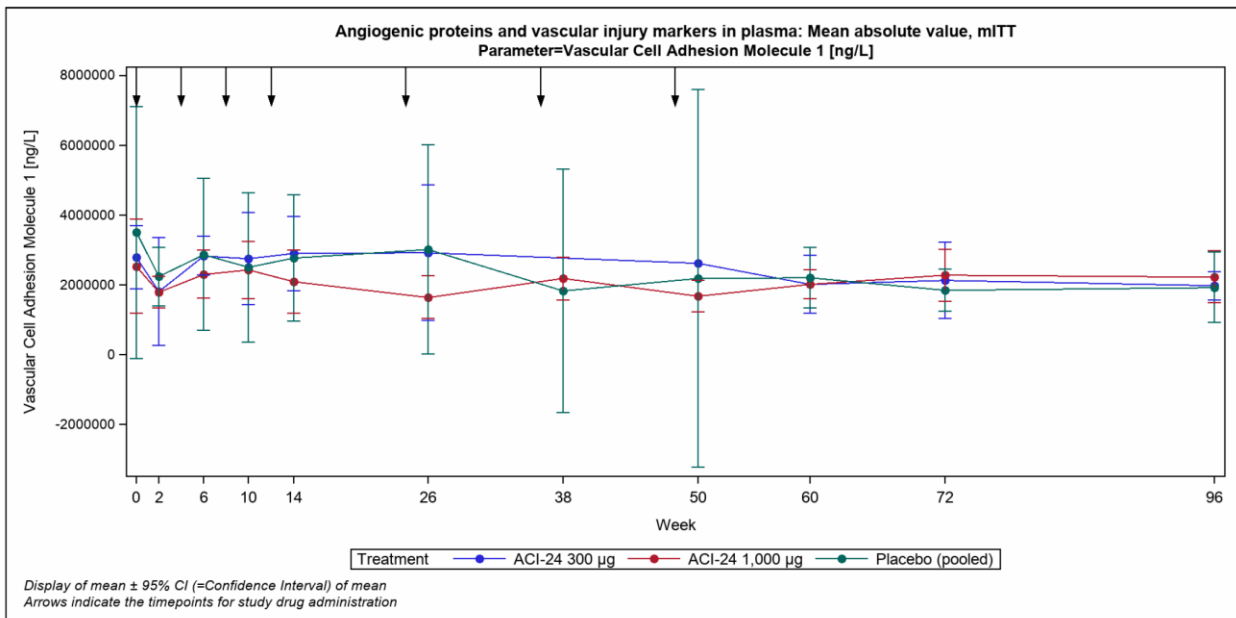

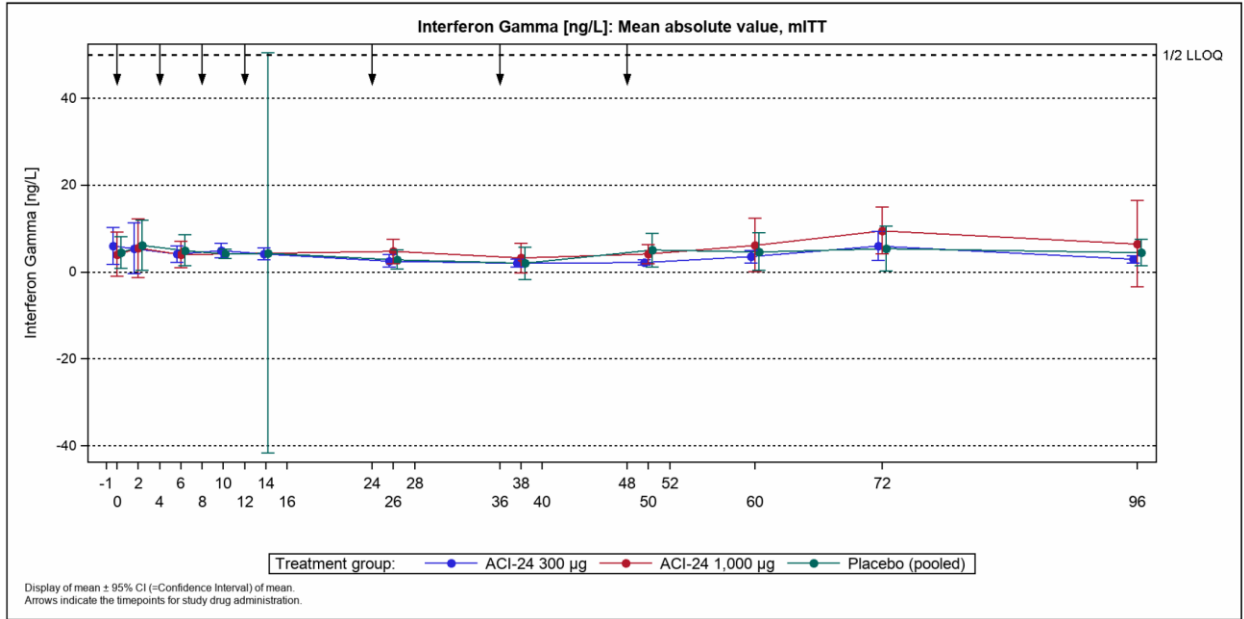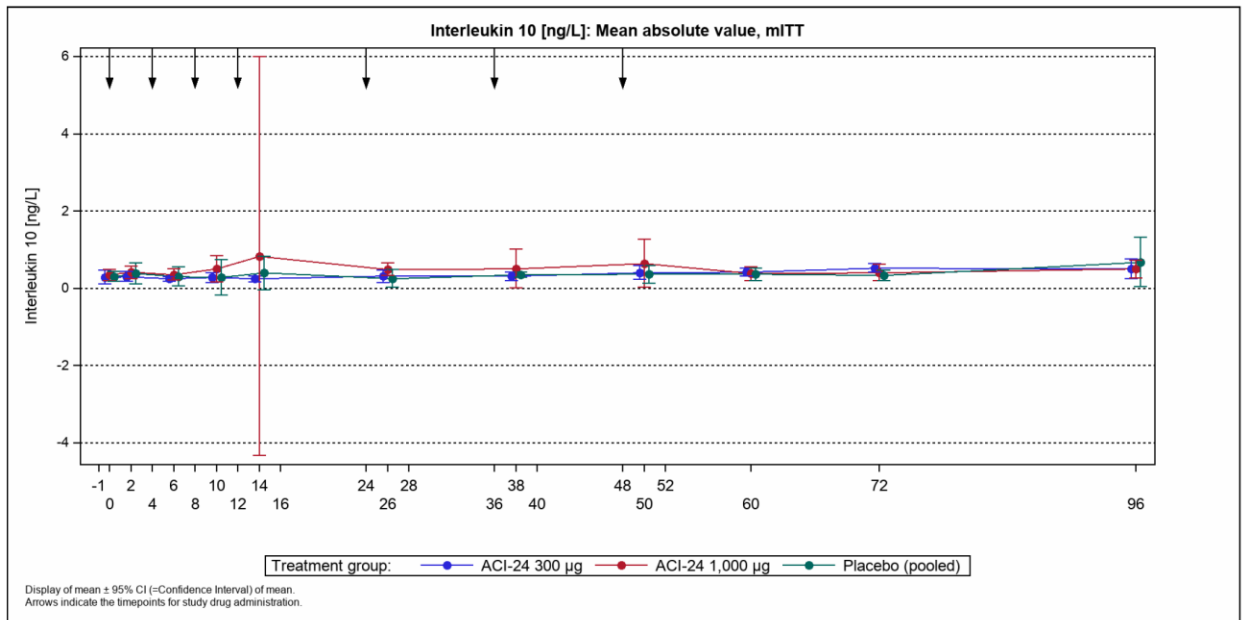

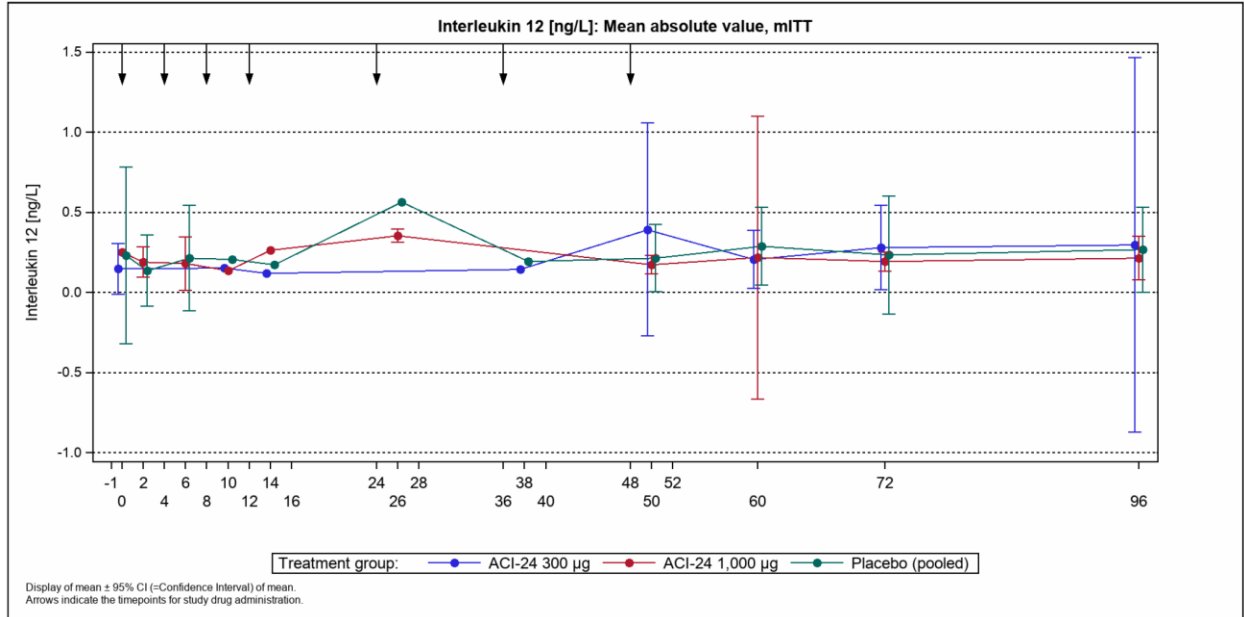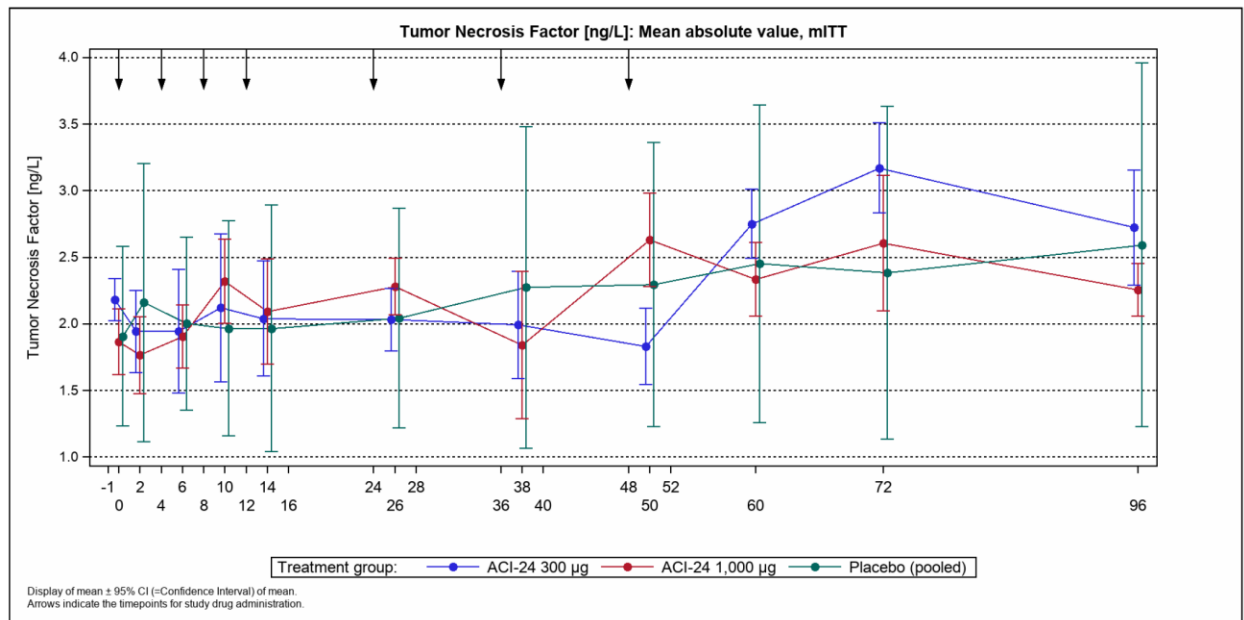



eFigure 2. Body Mass Index

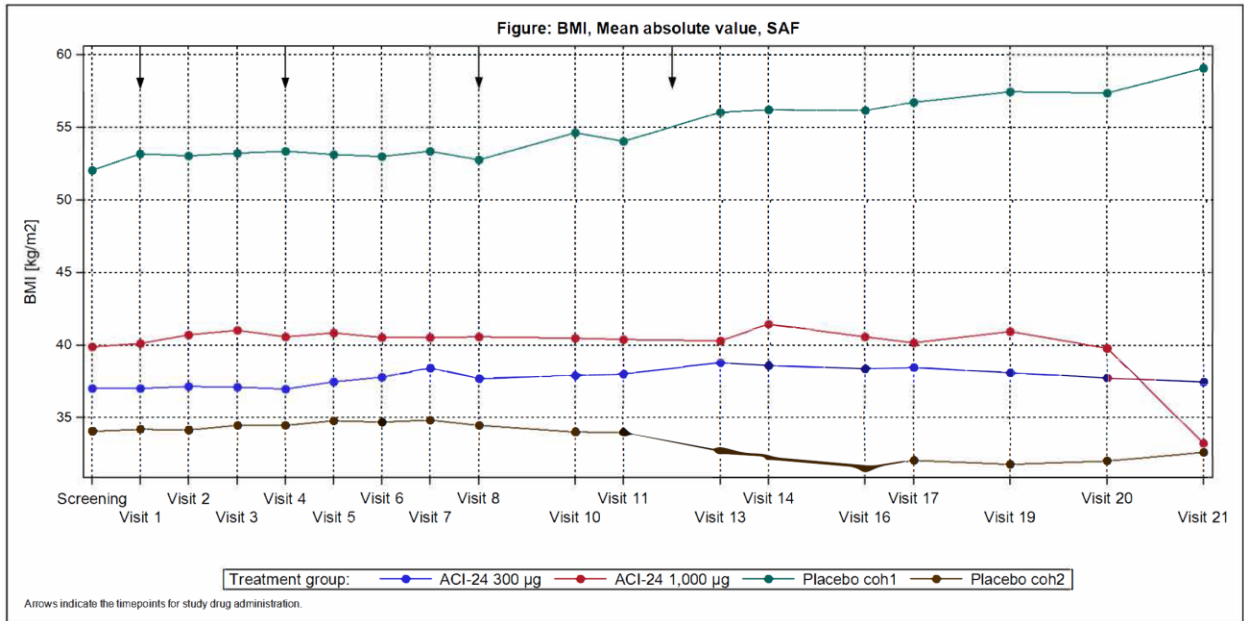

**eFigure 3.** Anti–Amyloid- $\beta$  1-42 Immunoglobulin G Titer in Serum Using the Meso Scale Discovery Free Assay: Change From Baseline in Modified Intention-to-Treat Population per Individual Participant

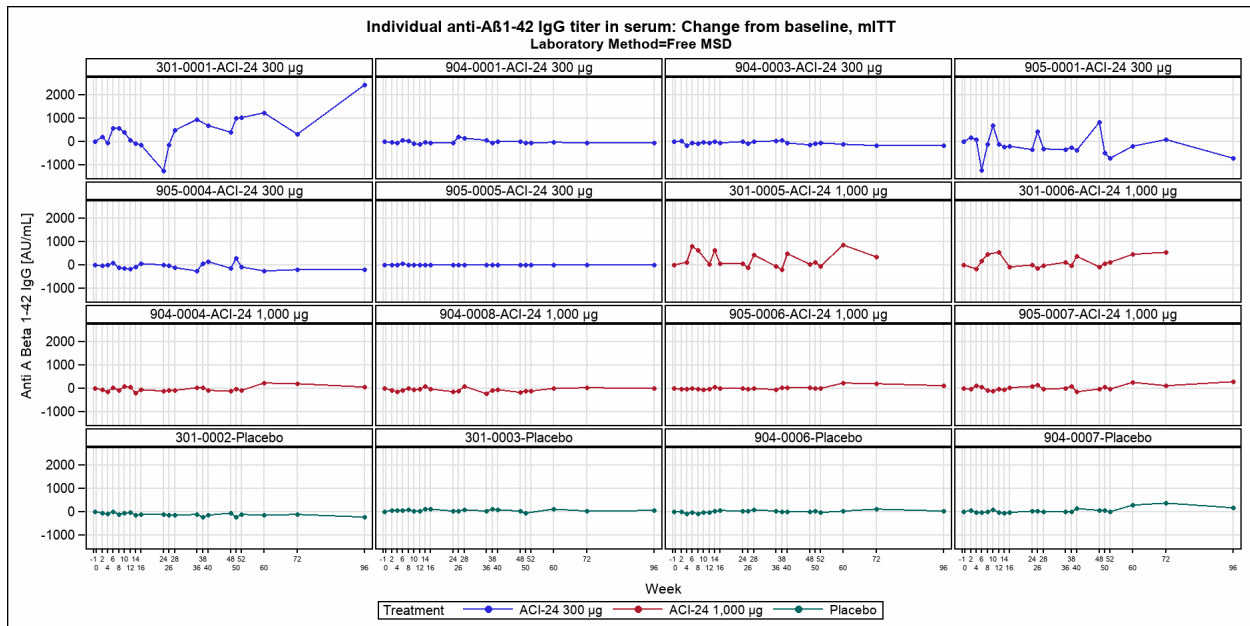

Abbreviations: A $\beta$ <sub>1-42</sub>=amyloid beta 1-42; AU=arbitrary units; IgG=immunoglobulin G; mITT=modified Intent-to-Treat; mL=milliliters; MSD=Meso Scale Discovery assay platform

**eFigure 4. Alzheimer Disease Biomarkers**

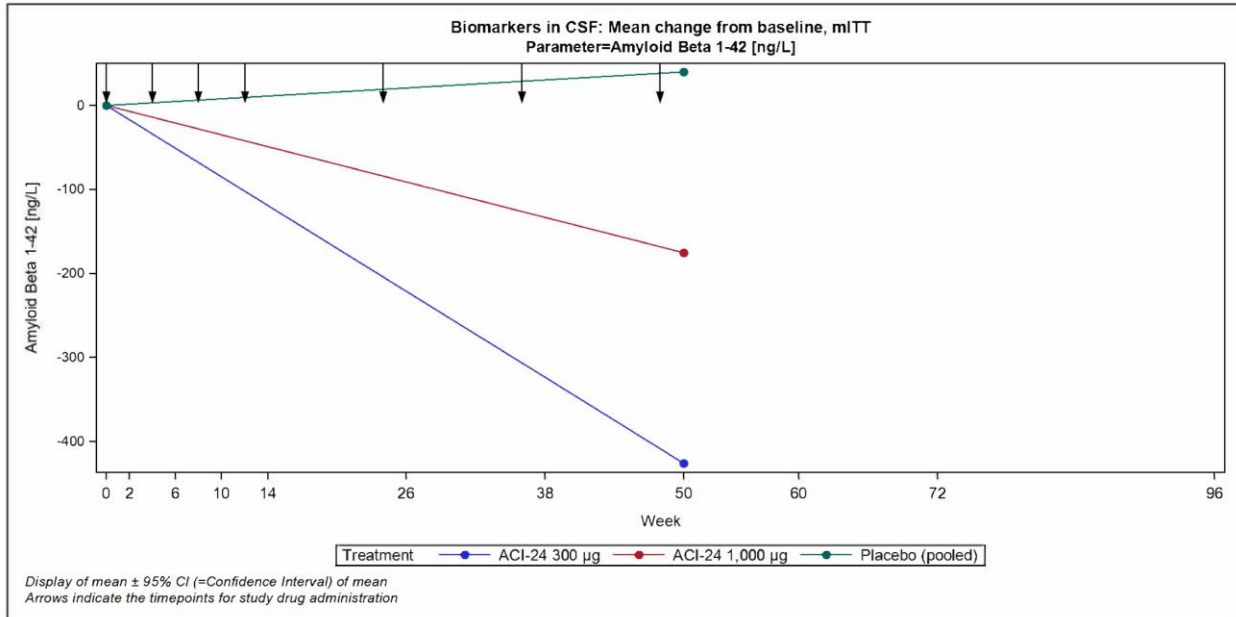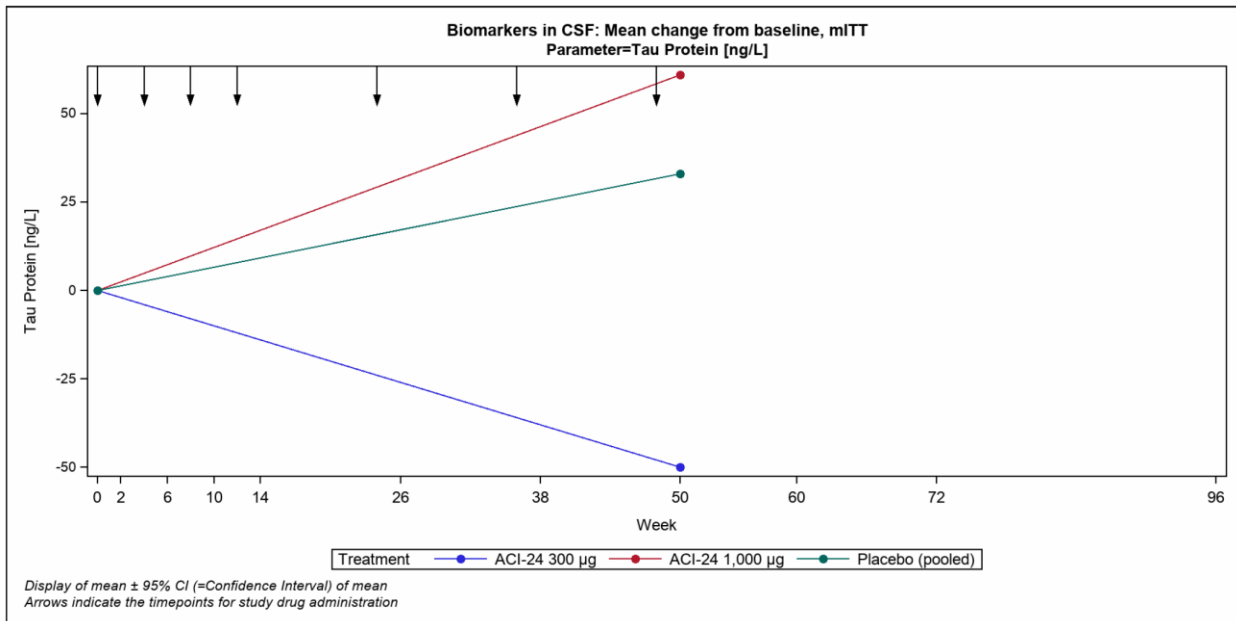

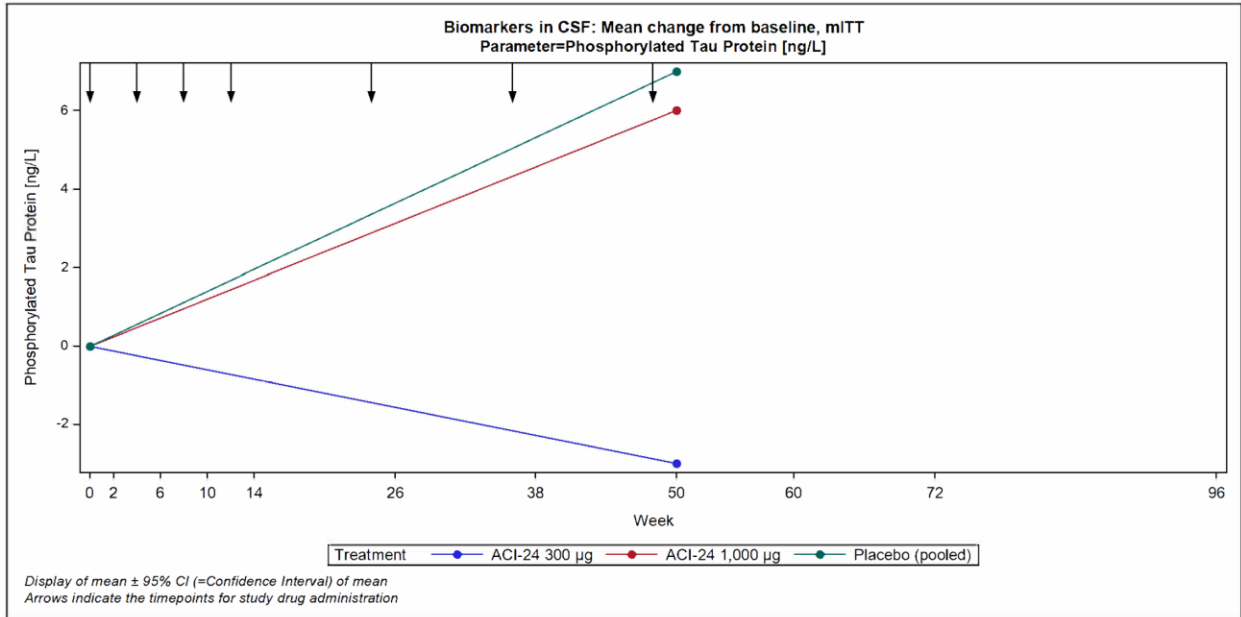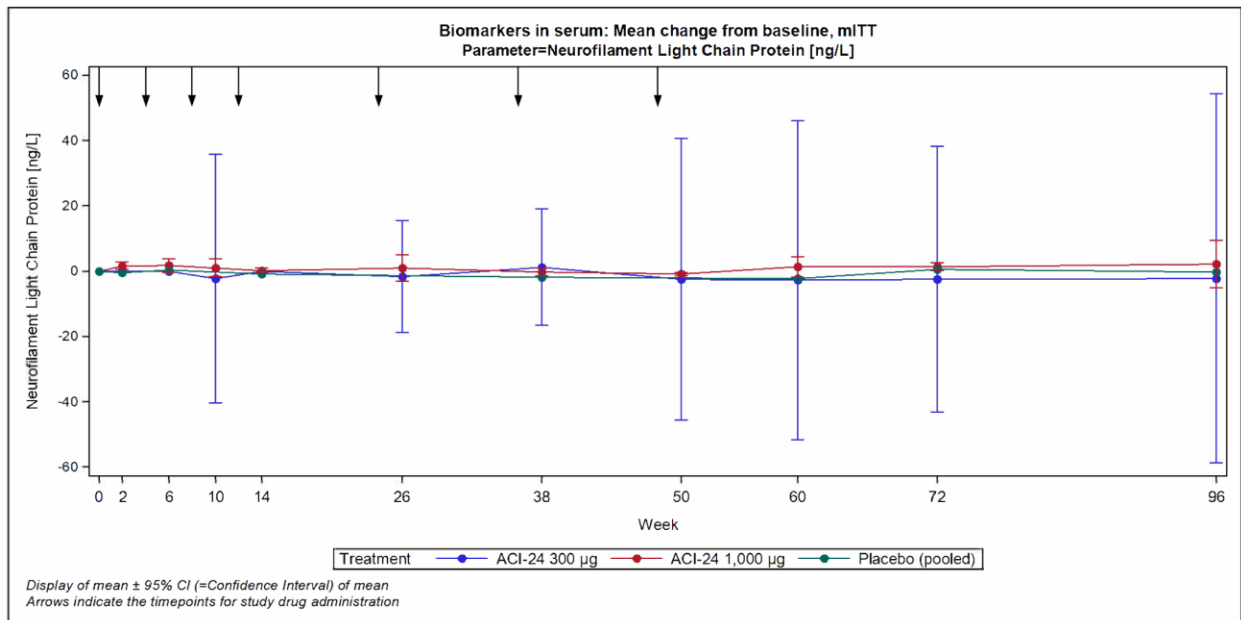

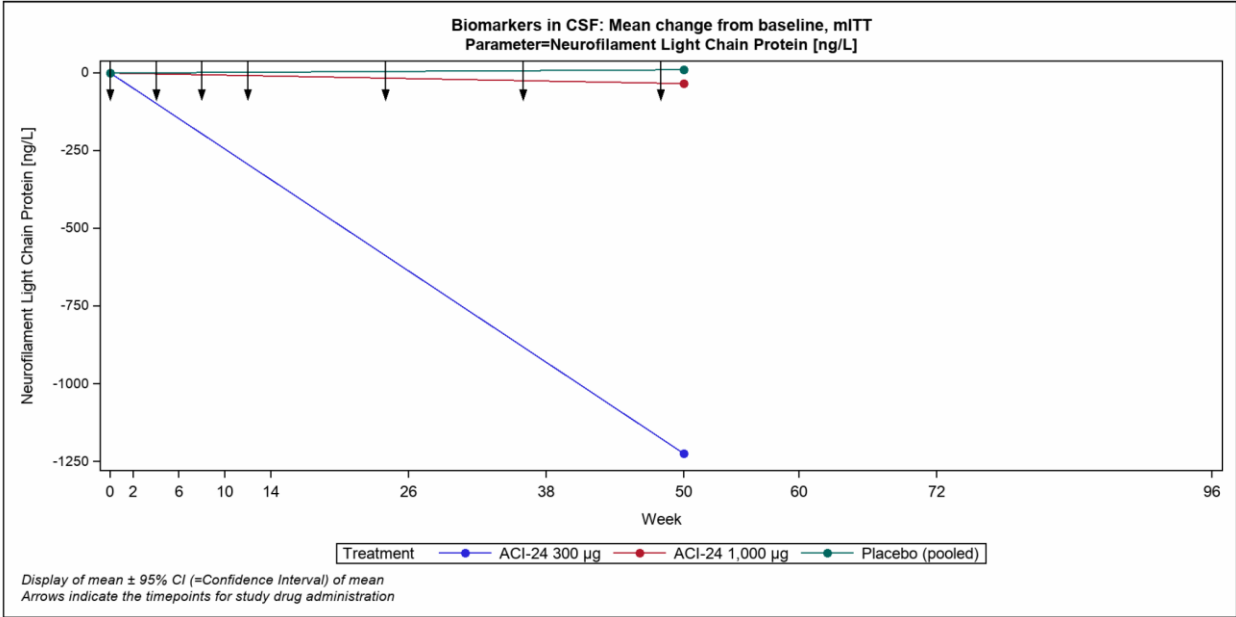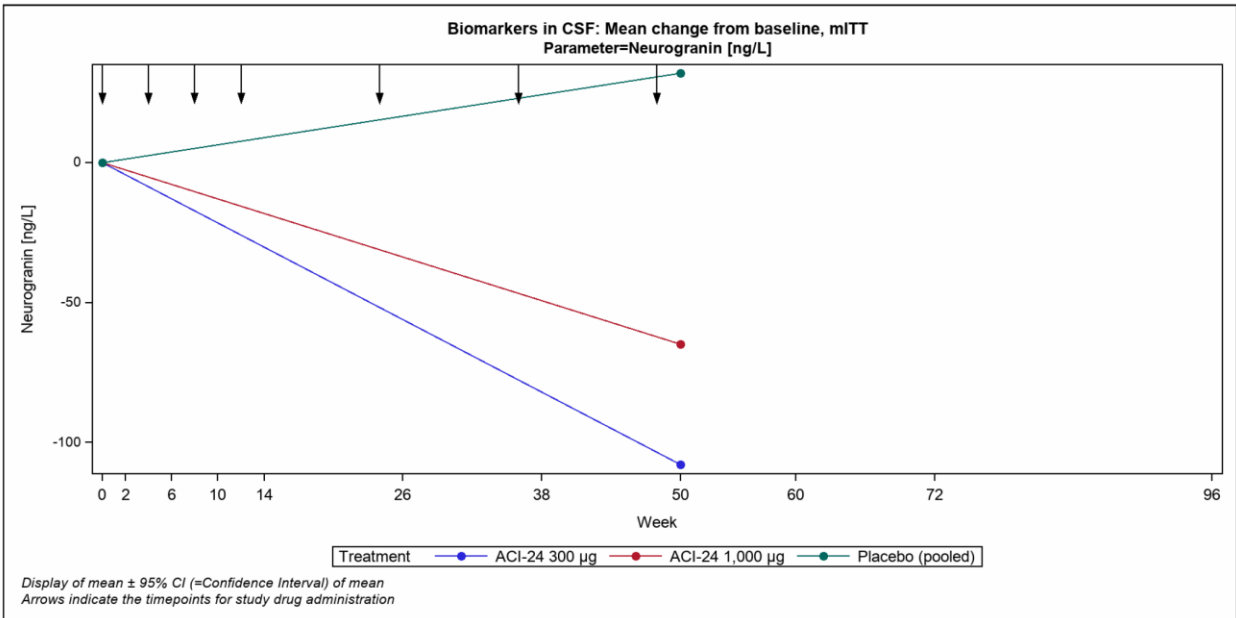

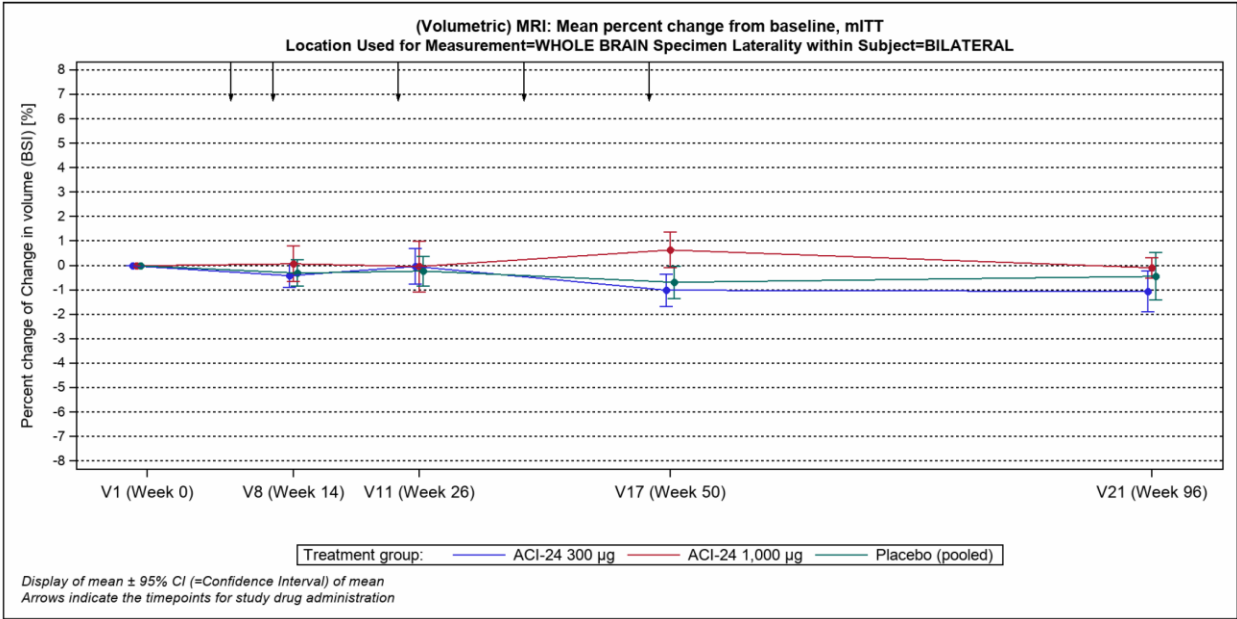

**eFigure 5. Cognitive Measures**

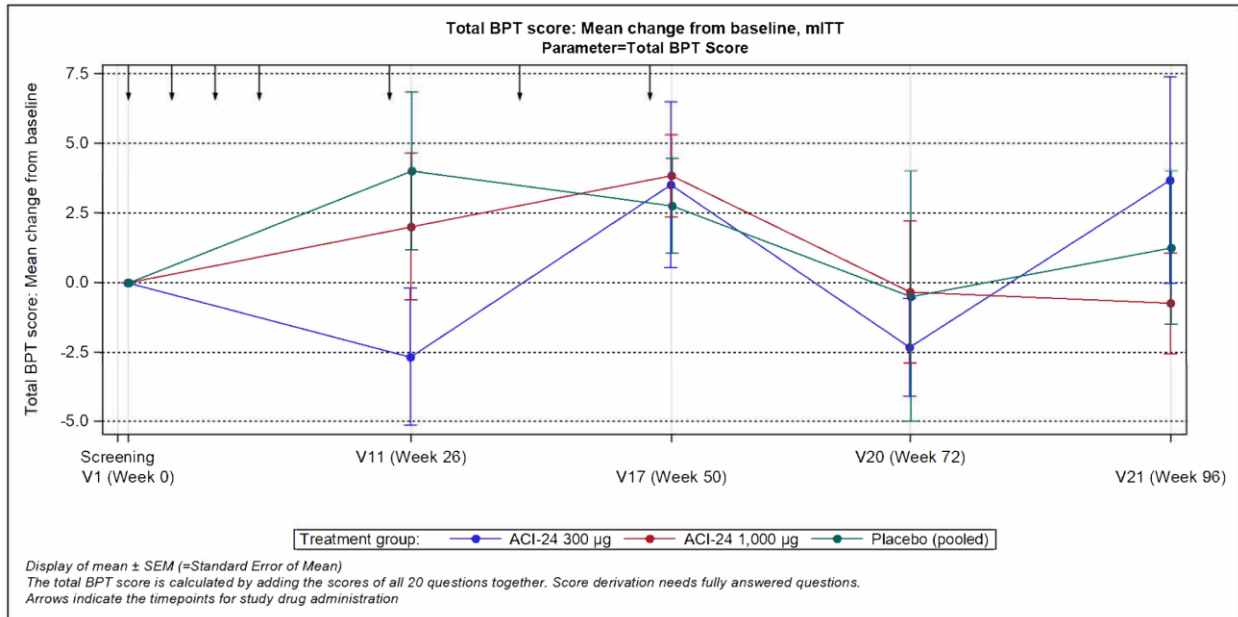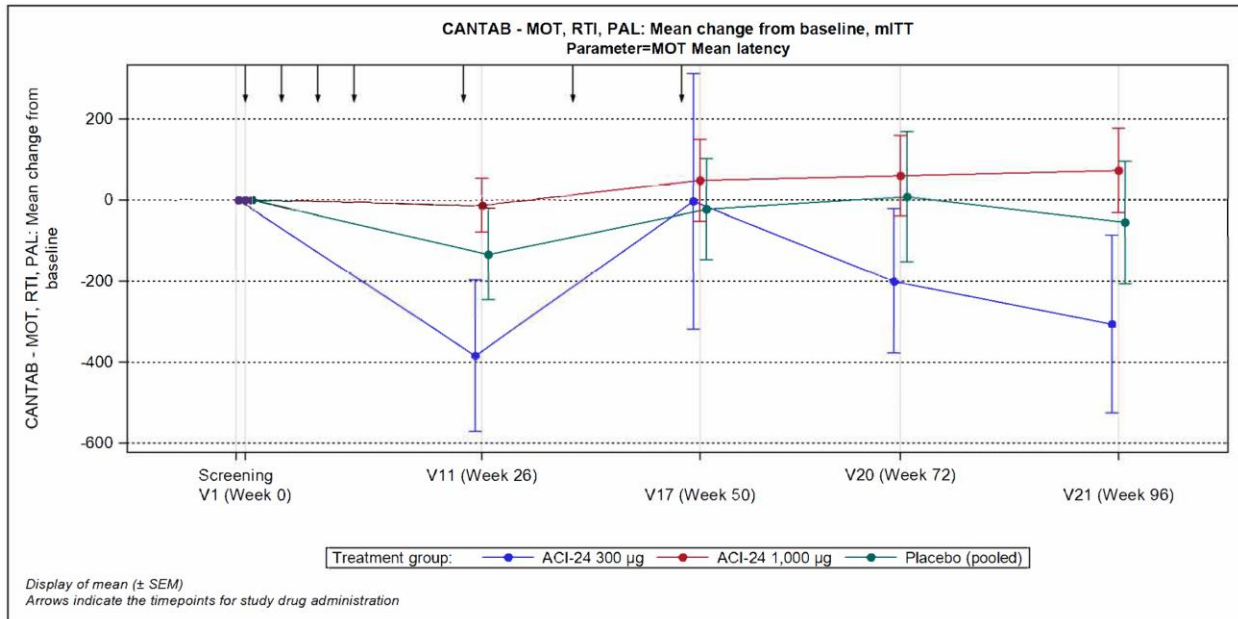

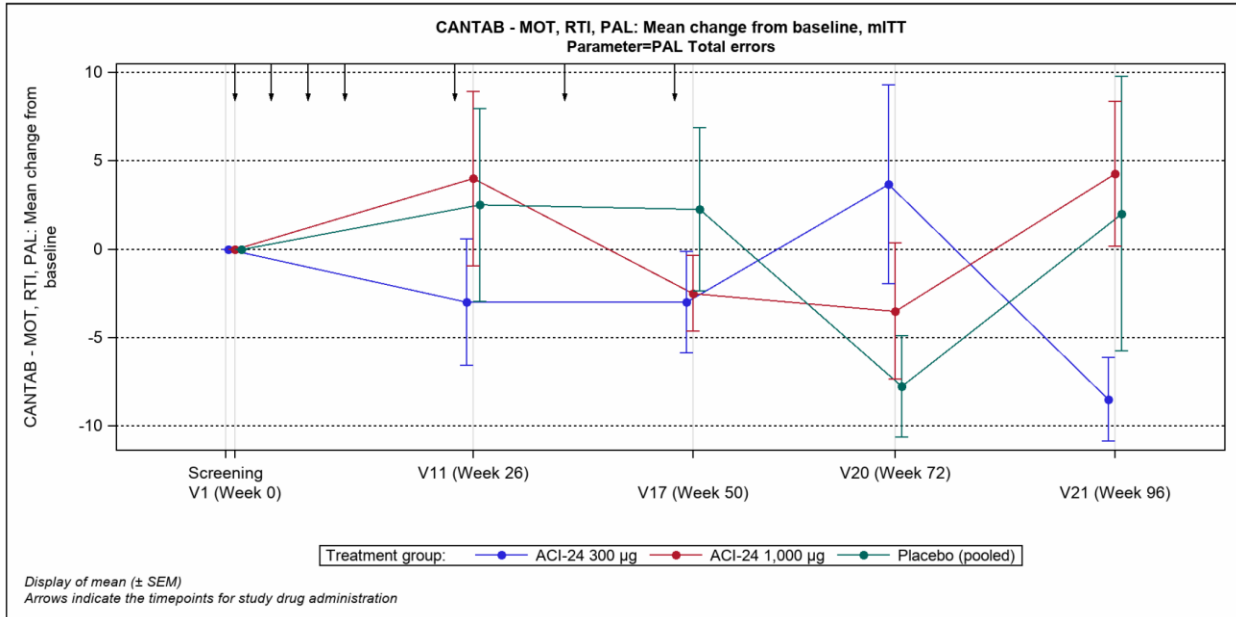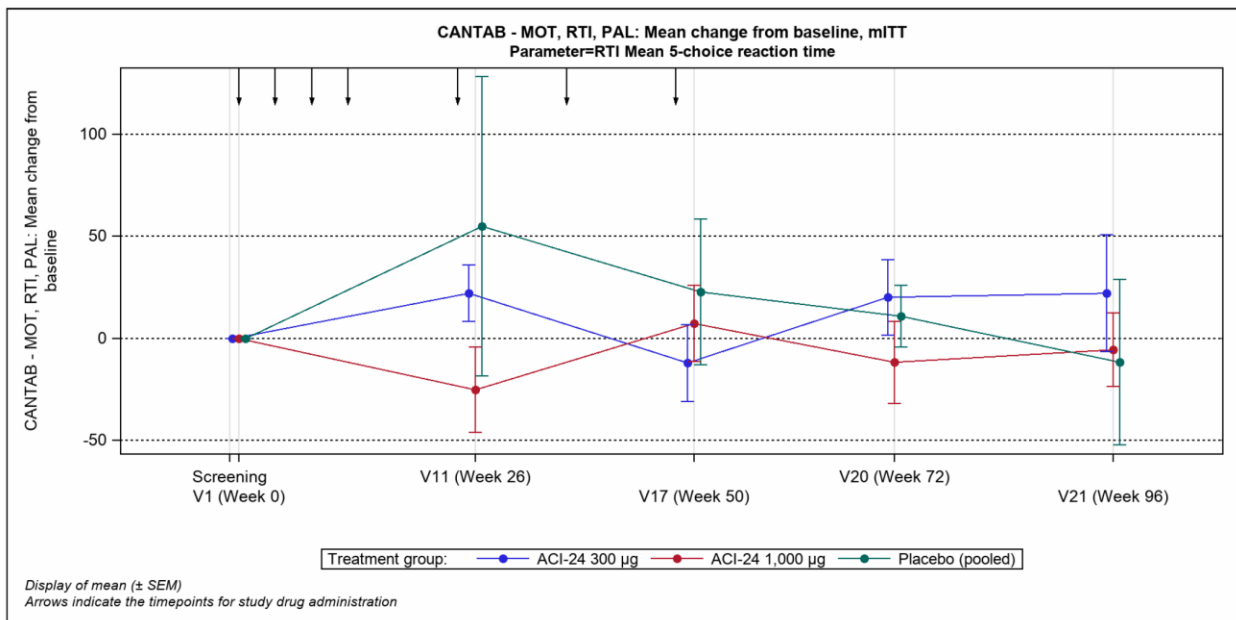



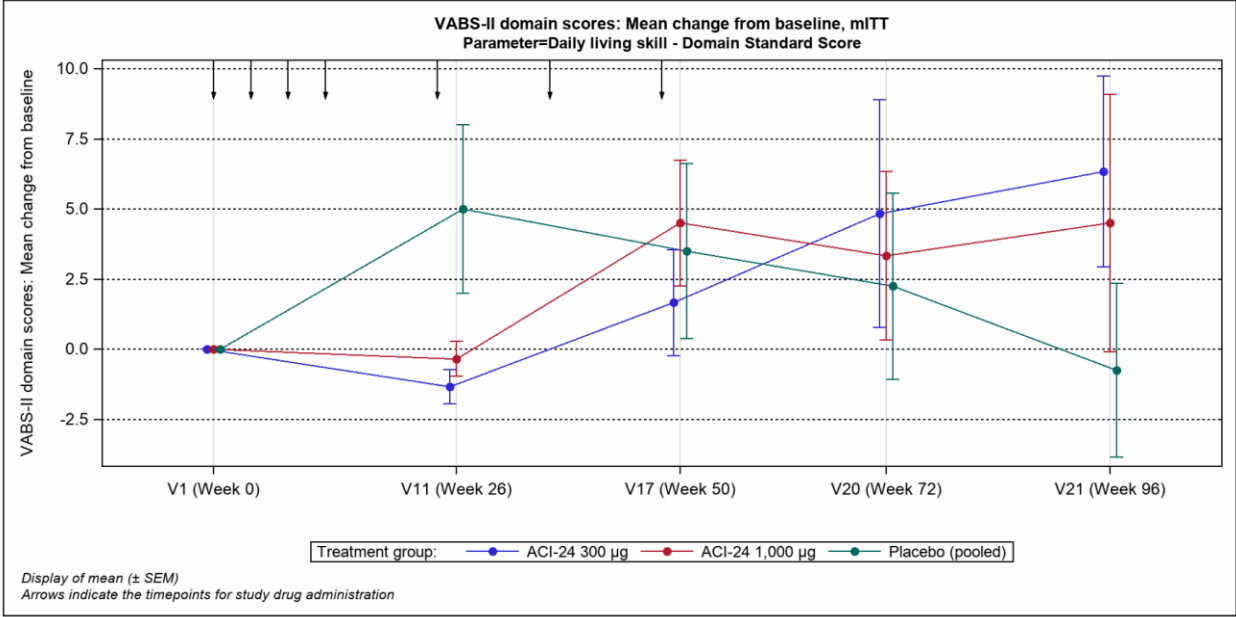

Supplement: jamaneurol-e220983-s002.pdf [file jamaneurol-e220983-s002.pdf]
