# Supplementary material
Source: PubMed Central journal article supplement (PMC9086937)
Supplement: jamaneurol-e220983-s003.pdf [file jamaneurol-e220983-s003.pdf]

## Data Sharing Statement

Rafii. Safety, Tolerability, and Immunogenicity of the ACI-24 Vaccine in Adults With Down Syndrome. *JAMA Neurol.* Published May 09, 2022. doi:10.1001/jamaneurol.2022.0983

### Data

**Data available:** Yes

**Data types:** Deidentified participant data, Participant data with identifiers, Data dictionary

**How to access data:** [acevans@health.ucsd.edu](mailto:acevans@health.ucsd.edu)

**When available:** beginning date: 07-01-2022

### Supporting Documents

**Document types:** None

### Additional Information

**Who can access the data:** Researchers whose proposed use of the data has been approved

**Types of analyses:** Clinical data, MRI, plasma and csf biomarkers, cognitive data

**Mechanisms of data availability:** Data repository
